# Supplementary material
Source: MDPI journal article supplement (https://www.mdpi.com/2079-6412/11/1/68)
Supplement: s1 [file s1]

# Antimicrobial Peptides Grafted onto a Plasma Polymer Inter-layer Platform: Performance upon Extended Bacterial Challenge

Stefani S. Griesser, Marek Jasieniak, Krasimir Vasilev and Hans J. Griesser \*

Future Industries Institute, University of South Australia, Mawson Lakes, SA 5095 Australia, stefan-igries-ser@gmail.com (S.S.G.) marek.jasieniak@unisa.edu.au (M.J.) krasimir.vasilev@unisa.edu.au (K.V.)

\* Correspondence: hans.griesser@unisa.edu.au

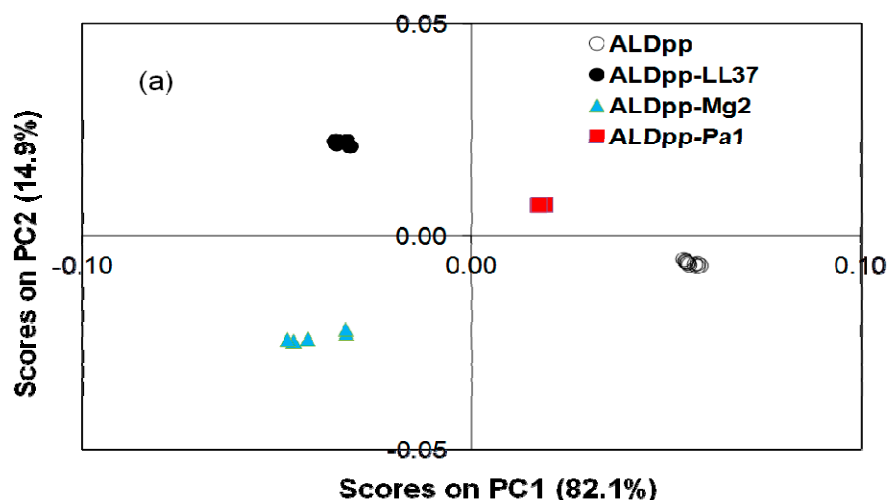

**Figure S1.** Scores plot on PC1 and PC2 for 3 surfaces with covalently immobilised antimicrobial peptides; 190 positive fragment ions were used in the calculations.

**Citation:** Griesser, S.S.; Jasieniak, M.; Vasilev, K.; Griesser, H.J. Antimicrobial peptides grafted onto a plasma polymer interlayer platform: performance upon extended bacterial challenge. *Coatings* **2021**, *10*, x. <https://doi.org/10.3390/xxxxx>

Received: 4 December 2020

Accepted: 28 December 2020

Published: date

**Publisher's Note:** MDPI stays neutral with regard to jurisdictional claims in published maps and institutional affiliations.

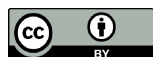

**Copyright:** © 2021 by the authors. Submitted for possible open access publication under the terms and conditions of the Creative Commons Attribution (CC BY) license (<http://creativecommons.org/licenses/by/4.0/>).

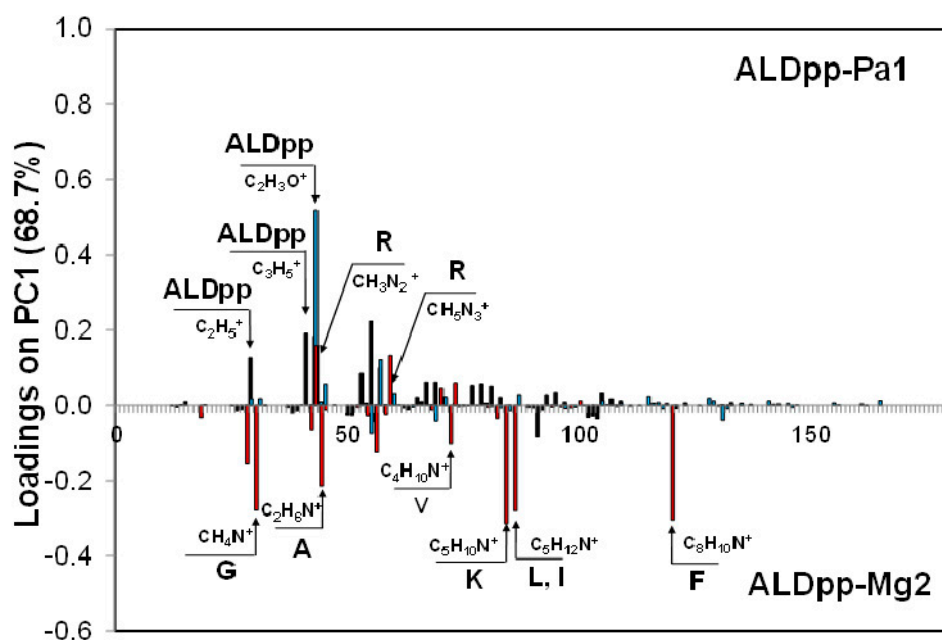

**Figure S2.** Loadings of positive fragments on PC1 and PC2 for surfaces with covalently immobilised antimicrobial peptides.
